# Supplementary material for: A stress-activated neuronal ensemble in the supramammillary nucleus produces anxiety-like behavior in male mice
Source: eLife. 2026 Apr 15;14:RP108593. doi: 10.7554/eLife.108593 (PMC13082789; doi:10.7554/eLife.108593)
Supplement: Figure 1—source data 1. [file elife-108593-fig1-data1.xlsx]

## Sheet: Sheet2
Figure 1C		Figure 1F
		Naïve		CSDS
No FS	FS	Baseline	Day 10	Baseline	Day 10
356	187	1.26116	1.06406	0.636093	1.37145
609	372	0.93331	0.790615	0.549395	2.01446
279	556	1.15606	0.692861	0.684153	0.612724
209	731	1.96445	0.735133	1.41542	0.541278
259	620	0.356271	0.653892	0.632323	2.6963
142	430	0.350983	0.766176	2.05905	1.11517
315	668	1.89967	0.742399	0.657767	1.50502
353	555	0.588937	0.657855	0.560704	2.57434
316	464	0.364864	0.615583	0.95786	2.5129
226	628	0.732371	1.21135	2.77946	2.43264
309		1.5467	0.667102	0.710796	2.0888
361		1.47201	0.474237	0.784327	2.12051
179		1.27438	0.401582	0.76766	2.67145
		1.45735	1.3342	0.556872	1.47147
		0.34749	1.63869	0.525499	2.1651
		1.49302	1.27608	1.97552	2.14726
		0.523218	1.2664	0.491185
		0.849568	0.388842	1.2559
		0.7366	0.837609
		0.491507
		0.385807
		1.00217
		1.8121
Figure 2-figure supplement 1 B
Naïve		CSDS
Baseline	Day 10	Baseline	Day 10
0.53109	1.05489	0.759134	0.5873
0.434647	0.663337	0.631028	2.68073
0.967472	0.624702	1.8237	3.76607
0.692167	0.61873	0.786134	0.535668
1.41325	0.533087		0.53848
0.605556	0.701897		0.617917
0.838187	4.62591		0.560448
0.960013	0.748652		0.767123
0.667371			0.956048
0.724165			0.616335
2.05327			0.570641
2.11281			1.46008
			1.02828
			0.608602
			1.12705
Figure	Panel	Statistical method	t/U/F value	df/sum of ranks	95% CI	p value
1	C	Unpaired t test	3.811	21	100.0 to 340.2	0.001
	F	Two-way ANOVA	Interaction, Time, Naïve vs. CSDS =15.27, 7.776, 15.27	1,72	-	<0.001, 0.007, <0.001
Figure 2-figure supplement 1 B	B	Two-way ANOVA	Interaction, Time, Naïve vs. CSDS =0.023, 0.188, 0.023	1,35	-	0.881, 0.668, 0.881

## Sheet: Sheet1
Baseline	0.53109	0.434647	0.967472	0.692167	1.41325	0.605556	0.838187	0.960013	0.667371	0.724165	2.05327	2.11281				0.759134	0.631028	1.8237	0.786134
Day 10	1.05489	0.663337	0.624702	0.61873	0.533087	0.701897	4.62591	0.748652								0.5873	2.68073	3.76607	0.535668	0.53848	0.617917	0.560448	0.767123	0.956048	0.616335	0.570641	1.46008	1.02828	0.608602	1.12705
Baseline	Day 10	Baseline	Day 10
0.53109	1.05489	0.759134	0.5873
0.434647	0.663337	0.631028	2.68073
0.967472	0.624702	1.8237	3.76607
0.692167	0.61873	0.786134	0.535668
1.41325	0.533087		0.53848
0.605556	0.701897		0.617917
0.838187	4.62591		0.560448
0.960013	0.748652		0.767123
0.667371			0.956048
0.724165			0.616335
2.05327			0.570641
2.11281			1.46008
			1.02828
			0.608602
			1.12705
