# Supplementary material for: A stress-activated neuronal ensemble in the supramammillary nucleus produces anxiety-like behavior in male mice
Source: eLife. 2026 Apr 15;14:RP108593. doi: 10.7554/eLife.108593 (PMC13082789; doi:10.7554/eLife.108593)
Supplement: Figure 2—source data 1. [file elife-108593-fig2-data1.xlsx]

## Sheet: Sheet2
Figure 2D		Figure 2E		Figure 2F		Figure 2G		Figure 2H
EGFP	Gq	EGFP	Gq	EGFP	Gq	EGFP	Gq	EGFP	Gq
12	51	11.3165	6.24934	35.04	48.48	42.26	28.76	0.46	0.17
27	81	11.4863	11.0787	24.48	44.28	53.36	0.56	0.45	0.17
27	98	15.3732	3.71734	60.44	20.16	10.5	8.66667	0.4	0
26	76	7.3801	15.978	22.2	55.96	28.6467	10.4133	0.48	0.21
		13.2989	21.043	32.52	96.44	35.3333	15.7267	0.48	0.08
		13.6336	20.8539	40.2	90.12	62.8467	4.39333	0.35	0.24
		15.8846	28.6466	58.88	118.48	24.0667	1.11333	0.44	0.29
		9.83377	23.6025	26.2	87.92	22.96	20.42	0.42	0.03
		29.8852	16.2445	99.52	58.12				0.35
		36.1524	46.6388	150.28	197.32				0.48
Figure 2-figure supplement 1
B		C		D		E
EGFP	Gq	EGFP	Gq	EGFP	Gq	EGFP	Gq
6780.98	7149.04	2714.85	3973.53	4717.84	482.05	2670.59	1265.2
4802.09	7012.74	3531.08	2930.26	2841.58	554.37	2355.1	1495.45
5557.73	9009.31	1925.29	3395.89	2969.37	1720.32	3033.37	1234.85
4080.84	8938.01	2558.62	4533.43	2721.57	1008.12	1534.01	2007.14
5766.67	8991.87	2513.86	3905.39	2314.68	377.51	2160.72	921.142
5586.11	3866.75	2536.64	1403.67	2567.1	1192.4	2031.34	908.065
5494.5	7791.62	2359.39	858.169	4679.52	1966.53	2760.45	2050.45
5197.46	5793.16	2323.3	1996.99	3128.76	3426.27	2960.44	2347.43
9836.71	5423.32			4280.66	1493.91	3596.98	1632.13
10746.7	5429.6			2823.64	2842.54	1653.66	2292.94
				4255	2591.41	2744.06	1245.56
				4249.33	4016.71	2623.6	2426.86
				4882.97	2876.06	2641.22	1223.9
				2769.95	2236.76	1135.43	2500.54
				2220.74		1887.75
Figure	Panel	Statistical method	t/U/F value	df/sum of ranks	95% CI	p value
2	D	Unpaired t test	5.15	6	28.1 to 78.9	0.002
	E	Unpaired t test	0.614	18	-7.227 to 13.19	0.547
	F	Mann Whitney test	33	88,122	-	0.218
	G	Unpaired t test	3.386	14	-38.78 to -8.703	0.004
	H	Mann Whitney test	7.5	108.5,62.5	-	0.002
S2	B	Unpaired t test	0.62	18	-1316 to 2427	0.54
	C	Unpaired t test	0.639	14	-746.6 to 1380	0.533
	D	Unpaired t test	3.89	27	-2315 to -715	<0.001
	E	Unpaired t test	3.079	27	-1173 to -234.8	0.005
