# Supplementary material for: A stress-activated neuronal ensemble in the supramammillary nucleus produces anxiety-like behavior in male mice
Source: eLife. 2026 Apr 15;14:RP108593. doi: 10.7554/eLife.108593 (PMC13082789; doi:10.7554/eLife.108593)
Supplement: Figure 3—source data 1. [file elife-108593-fig3-data1.xlsx]

## Sheet: Sheet2
Figure 3C					Figure 3F			Figure 3G			Figure 3H
SuML	SuMM	ML	MM	MMn	HC1st + Sucrose pellet2nd	FS1st + Sucrose pellet2nd	FS1st + Social stress2nd	HC+Sucrose pellet	FS+Sucrose pellet	FS+Social stress	HC+Sucrose pellet	FS+Sucrose pellet	FS+Social stress
98	86	6	19	8	6.65914	12.8814	11.4352	0.112867	0.338983	1.28355	1.69492	2.63158	9.18367
103	83	4	38	9	6.50155	12.6428	12.3894	0.309598	0.304646	1.17994	1.5873	1.20482	4.7619
67	84	5	5	4	6.13354	12.5305	10.9125	0	0.325468	2.16369	0	0.649351	6.89655
Figure	Panel	Statistical method	t/U/F value	df/sum of ranks	95% CI	p value
3	C	One-way ANOVA	39.9	4,10	-	<0.001
	F	One-way ANOVA	151	2,6	-	<0.001
	G	One-way ANOVA	16.5	2,6	-	0.004
	H	One-way ANOVA	14.08	2,6	-	0.005
