# Supplementary material for: A stress-activated neuronal ensemble in the supramammillary nucleus produces anxiety-like behavior in male mice
Source: eLife. 2026 Apr 15;14:RP108593. doi: 10.7554/eLife.108593 (PMC13082789; doi:10.7554/eLife.108593)
Supplement: Figure 4—source data 1. [file elife-108593-fig4-data1.xlsx]

## Sheet: Sheet2
Figure 4B				Figure 4D		Figure 4F		Figure 4I		Figure 4J		Figure 4K		Figure 4L
Control		Foot-shock		EGFP	Gq	EGFP	Gq	EGFP	Gq	EGFP	Gq	EGFP	Gq	EGFP	Gq
Day 2	Day 7	Day 2	Day 7	170.714	527.464	6.61157	88.2353	19.5997	14.6575	68.6	2.08	41.4867	2.54	0.27	0.28
40.48	18.2333	41.48	21.6867	106.641	294.428	4.30108	73.3333	20.8623	9.47003	71.8	0.56	19.96	2.13333	0.43	0.12
33.6533	23.2067	32.4533	22.8933	135.48	130.252	4.81928	55.5556	13.6585	13.4987	40.8	48.92	34.0933	1.59333	0.51	0.07
31.5333	32.4933	27.3867	28.9133	148.532	245.438	15.3267	77.34	5.84876	5.46743	12.8	8.84	9.44667	2.99333	0.48	0.25
29.6533	41.6933	15.4667	20.52		330.872		94.6667	21.2756	0	95.44	0	13.7	32.4733	0.39	0.33
45.6667	21.7333	12.9333	29.1					24.421	0	80.28	0	20.1533	5.64	0.46	0.27
34.24	26.5867	9.65333	10.6067					23.1782	8.86249	83.72	8.28	25.0867	26.06	0.41	0.2
31.2667	24.6267	33.8667	9.02667					16.04	9.4054	62.56	16.76	37.0667	28.8867	0.42	0.22
44.7733	22.4467	24.5333	31.26					18.5163	5.25926	68.92	5.56	35.6533	8.6	0.31	0.41
31.8133	22.56	40.0667	31.7267					15.1599	16.9622	48.4	49.88	16.8333	13.7924	0.25	0.38
23.8	16.78	15.5733	20.9867					17.7797	5.60969	50.44	22.8	26.66	3.04646	0.26	0.28
	26.6733		26.52					24.6255	20.0641	100	84.88	33.015	15.119	0.38	0.2
								19.8004	14.6975	66.04	32.32	37.8708	4.39971	0.24	0.29
								13.1466	11.1492	29.96	33.72	7.61496	54.3231		0.21
								29.5855		143.16		1.26658			0.21
Figure	Panel	Statistical method	t/U/F value	df/sum of ranks	95% CI	p value
4	B	Two-way ANOVA	Interaction, Time, Control vs. Foot-shock =1.903,5.155,4.886	1,38	-	0.176,0.029,0.033
	D	Unpaired t test	2.59	7	-306 to -25.0	0.025
	F	Unpaired t test	8.793	7	51.22 to 88.90	<0.001
	I	Unpaired t test	4.24	27	-13.7 to -4.77	<0.001
	J	Unpaired t test	4.31	27	-67.5 to -24.0	<0.001
	K	Mann Whitney test	58	272,163	-	0.041
	L	Unpaired t test	3.532	26	-0.1930 to -0.05100	0.002
