# Supplementary material for: A stress-activated neuronal ensemble in the supramammillary nucleus produces anxiety-like behavior in male mice
Source: eLife. 2026 Apr 15;14:RP108593. doi: 10.7554/eLife.108593 (PMC13082789; doi:10.7554/eLife.108593)
Supplement: Figure 5—source data 1. [file elife-108593-fig5-data1.xlsx]

## Sheet: Sheet2
Figure 5L		Figure 5M		Figure 5Q		Figure 5R
dSubProjection	vSubProjection	dSubProjection	vSubProjection	dSubProjection	vSubProjection	dSubProjection	vSubProjection
-11.8026	6.68772	2.418	32.34	11.8576	7.25797	89.8	30.67
5.2051	4.80719	15.85	10.06	1.73104	21.7127	1.552	121.3
-2.40697	4.22822	2.033	6.767	1.14438	6.77041	3.215	62.22
3.47209	14.4957	6.512	35.42	5.91777	2.59883	19.93	7.03
-2.71788	8.91124	1.227	37.9	14.3175	13.1679	112.2	79.51
					13.7501		41.56
Figure 5-figure supplement 3 D
dSubProjection	vSubProjection
14.783	-16.491
1.17113	-6.76031
6.15077	-10.2428
3.35675	-6.71984
3.46222	-6.1431
Figure	Panel	Statistical method	t/U/F value	df/sum of ranks	95% CI	p value
5	L	Unpaired t test	2.696	8	1.372 to 17.58	0.027
	M	Unpaired t test	2.631	8	2.332 to 35.45	0.03
	Q	Unpaired t test	1	9	-4.897 to 12.66	0.343
	R	Unpaired t test	0.422	9	-51.03 to 74.45	0.683
Figure 5-figure supplement 3	D	Unpaired t test	4.893	8	-22.15 to -7.691	0.001
