# Supplementary material for: A stress-activated neuronal ensemble in the supramammillary nucleus produces anxiety-like behavior in male mice
Source: eLife. 2026 Apr 15;14:RP108593. doi: 10.7554/eLife.108593 (PMC13082789; doi:10.7554/eLife.108593)
Supplement: Figure 6—source data 1. [file elife-108593-fig6-data1.xlsx]

## Sheet: Sheet2
Figure 6C
Day	Naive-mCherry							CSDS-mCherry						Naive-Gi										CSDS-Gi
0	100	100	100	100	100	100	100	100	100	100	100	100	100	100	100	100	100	100	100	100	100	100	100	100	100	100	100	100	100	100	100	100	100
1	102.909	99.3266	100.342	102.135	98.9899	106.316	99.41	98.6441	101.538	100.352	99.6503	97.4504	98.5955	101.115	101.961	103.788	102.256	103.488	101.031	100.33	98.855	99.6337	100	93.1596	98.2759	100.329	100.778	99.3569	100.755	105.2	96.7066	100.339	98.1707
2	100	98.6532	100.342	101.068	98.9899	106.667	98.8201	98.6441	101.923	98.9437	97.9021	96.034	97.4719	101.115	102.353	102.652	103.008	104.264	100.687	100	99.6183	98.9011	101.031	92.8339	100	102.303	99.6109	101.929	100.755	109.2	95.509	99.661	97.561
3	100	98.9899	99.3151	100.712	99.6633	105.965	100.295	100.678	101.154	99.6479	99.6503	98.017	96.0674	101.487	104.706	103.788	103.008	104.651	103.093	99.3399	99.2366	99.6337	100	99.6743	96.5517	102.632	100.389	95.8199	102.642	113.2	95.509	100.339	96.9512
4	99.2727	97.6431	99.3151	98.2206	97.6431	105.614	98.2301	98.9831	103.462	99.6479	98.6014	96.3173	96.3483	101.115	103.529	102.273	100.752	104.264	102.749	101.32	99.6183	98.1685	99.3127	99.0228	95.5172	98.6842	100.778	95.8199	102.642	114	86.8263	102.373	97.2561
5	98.9091	97.3064	99.6575	100	98.9899	100	99.115	100	107.308	97.5352	100.699	95.1841	94.1011	100.372	104.706	103.03	101.88	105.039	104.124	101.98	99.6183	98.5348	98.6254	100.326	96.2069	100.329	100.389	91.6399	103.019	113.6	96.4072	100.339	98.1707
6	98.1818	96.633	97.9452	98.2206	98.3165	107.018	102.36	100.678	105.769	98.2394	100.699	93.4844	96.9101	101.115	103.137	102.273	100.376	105.039	105.155	103.3	100	98.9011	98.6254	100.326	95.8621	100	102.724	91.3183	102.642	117.6	97.6048	101.017	100
7	98.1818	96.9697	97.2603	98.2206	98.6532	106.316	100.885	100	106.154	99.6479	97.9021	95.1841	97.7528	101.859	104.706	101.515	100.752	103.876	106.529	103.3	98.855	98.9011	100.687	101.303	97.5862	99.3421	101.556	83.6013	102.264	114	101.796	101.017	98.7805
8	98.1818	97.3064	96.5753	98.5765	98.6532	104.211	97.3451	98.9831	108.846	101.761	100	95.4674	96.9101	101.859	106.275	102.273	102.632	106.589	105.498	101.65	96.1832	97.4359	98.9691	100.651	97.5862	99.0132	101.556	87.1383	103.774	117.6	91.3174	103.051	100.61
9	98.9091	97.3064	99.6575	97.153	96.633	103.509	98.2301	97.6271	105.385	100.704	100.35	95.7507	93.5393	100.372	106.667	102.652	103.008	106.589	103.78	101.65	96.5649	98.5348	98.6254	97.0684	96.8966	100	103.502	88.1029	104.528	116.4	98.2036	102.034	98.1707
10	97.4545	97.6431	98.9726	97.153	97.3064	100.702	98.5251	100	108.846	98.9437	102.448	95.1841	96.6292	102.23	106.275	103.03	102.256	106.977	103.436	101.32	100.763	99.6337	100.344	97.0684	96.8966	97.0395	100.778	94.5338	103.396	116.8	93.1138	102.712	98.7805
Figure 6E				Figure 6F				Figure 6G
mCherry		Gi		mCherry		Gi		mCherry		Gi
Naive	CSDS	Naive	CSDS	Naive	CSDS	Naive	CSDS	Naive	CSDS	Naive	CSDS
0.308374	0.294571	0.166452	-0.02965	2834.12	1130.16	1800.16	2801.62	18.9388	3.32645	14.339	23.1518
0.125768	-0.08201	0.469539	0.365895	1680.87	1353.43	2700.73	2644.42	18.6054	9.23938	16.3522	13.5191
0.190857	0.348287	-0.02175	0.265585	2524.35	2040.89	1958.7	1764.48	25.5383	7.79948	14.4724	12.9925
0.00668	-0.07247	0.258022	0.267803	3409.86	1254.93	1996.08	3311.9	27.5315	7.19285	18.6988	33.3444
0.01238	0.32	0.260631	0.44697	3356.78	2496.26	2095.28	1978.39	25.6983	20.3853	22.3411	20.7453
0.41	0.02	0.62	0.25	3085.95	1821.99	2140.34	2686.69	29.4047	6.57289	12.6925	18.2014
-0.28		0	0.31	2881.25		3046.37	4127.6	30.3846		20.9453	30.3113
		-0.21	-0.11			2555.89	2227.39			21.1919	11.5459
		0.52	0.49			3419.05	3601.07			29.3309	22.2919
		0.11	-0.49			3033.47	3302.4			20.8053	24.4584
Figure	Panel	Statistical method	t/U/F value	df/sum of ranks	95% CI	p value
6	C	Two-way ANOVA	Interaction, Time, Column =0.266,0.109,5.79	30,319		1,1,<0.001
	E	Two-way ANOVA	Interaction, Naïve vs. CSDS, mCherry vs. Gi =0.135,0.005,0.615	1,29		0.716,0.944,0.439
	F	Two-way ANOVA	Interaction, Naïve vs. CSDS, mCherry vs. Gi =11.5,2.998,3.315			0.002,0.094,0.079
	G	Two-way ANOVA	Interaction, Naïve vs. CSDS, mCherry vs. Gi =18.5,11.4,2			<0.001,0.002,0.168
